# Supplementary material for: Phenotypic Spectrum and Molecular Findings in 17 ATR-X Syndrome Italian Patients: Some New Insights
Source: MDPI journal article supplement (doi:10.3390/genes13101792), 2022-10-04
Supplement: s1 [file s1]

**Supplementary Table S1**

Distribution of the mutations among the different protein domains

| <i>Involved domain</i> | <i>N. of different mutations</i> | <i>N. of independent cases</i> | <i>%</i> |
|------------------------|----------------------------------|--------------------------------|----------|
| <i>ADD</i>             | 3                                | 7                              | 50       |
| <i>Helicase</i>        | 4                                | 4                              | 28.5     |
| <i>Others</i>          | 3                                | 3                              | 21.5     |
